# Supplementary material
Source: Research Square preprint supplement (doi:10.21203/rs.3.rs-9295451/v1)
Supplement: Supplementary file 1 [file d6955357abda659b7c41eb33.pdf]

# **Supplementary Information for An Active Learning Workflow for Predicting Misfit Volume in Body-Centered Cubic Refractory High-Entropy Alloys**

**Shunshun Liu<sup>1</sup> and Prasanna V. Balachandran<sup>1,\*</sup>**

<sup>1</sup>University of Virginia, Department of Materials Science and Engineering, Charlottesville, 22903, USA

\*pvb5e@virginia.edu

## S1 Misfit Volume Calculation

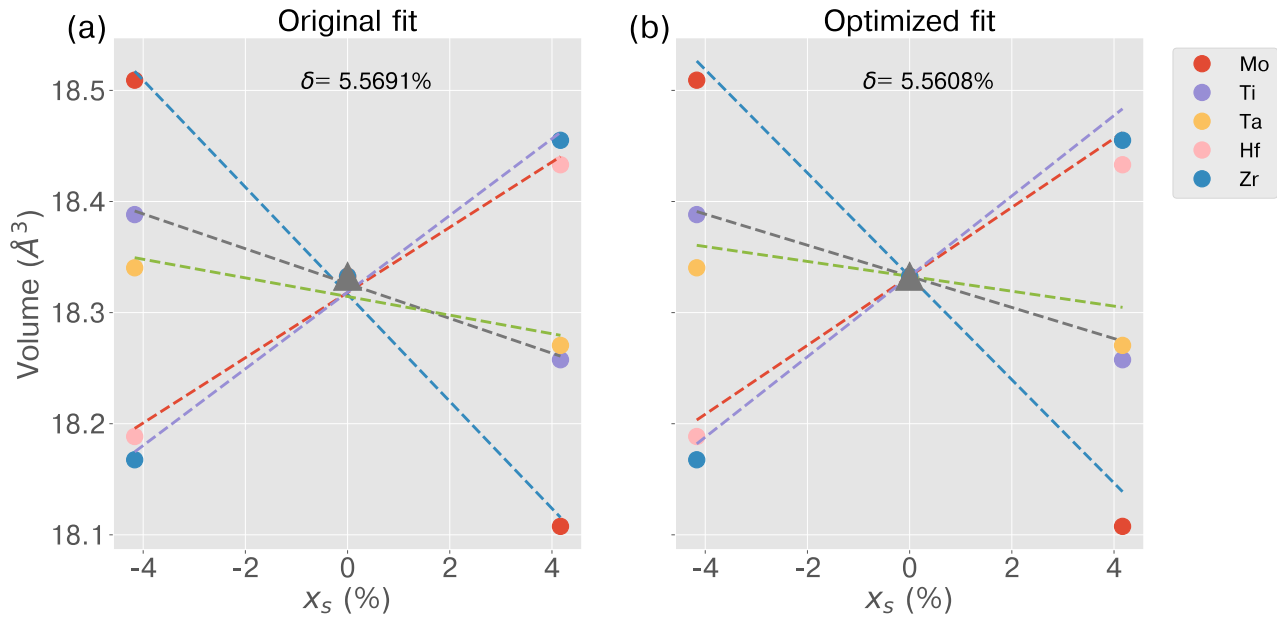

**Figure S1.** Elemental misfit volume ( $\Delta V_n$ ) fitting for the BCC HfMoTaTiZr RHEA. Each line is fit using three compositions, with  $\Delta V_n$  extracted from the slope. (a) Unconstrained fit (original), in which each element's slope is determined independently. (b) Constrained fit (optimized), in which the slopes are determined subject to  $\sum_n \Delta V_n = 0$ .

## S2 Active Learning and Machine Learning Performance

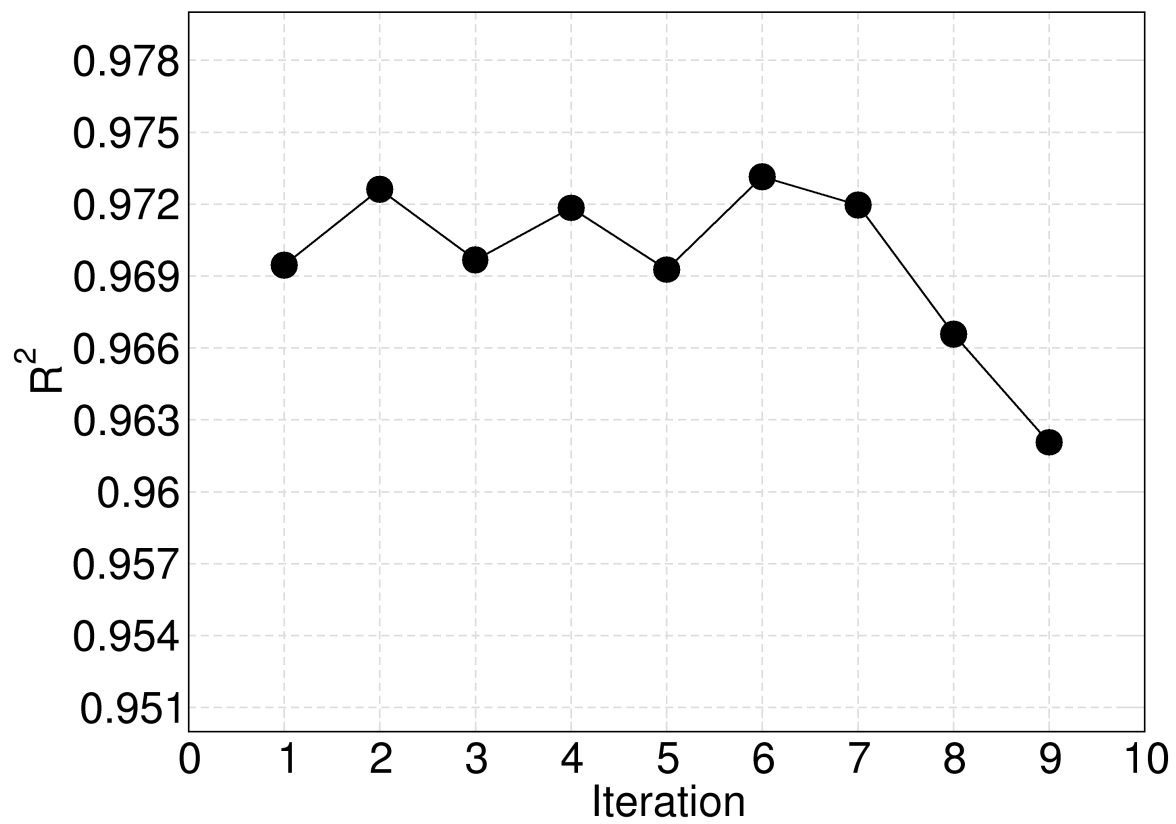

**Figure S2.** The training set  $R^2$  score of the ensemble support vector regression (eSVR) model after each active learning iteration.

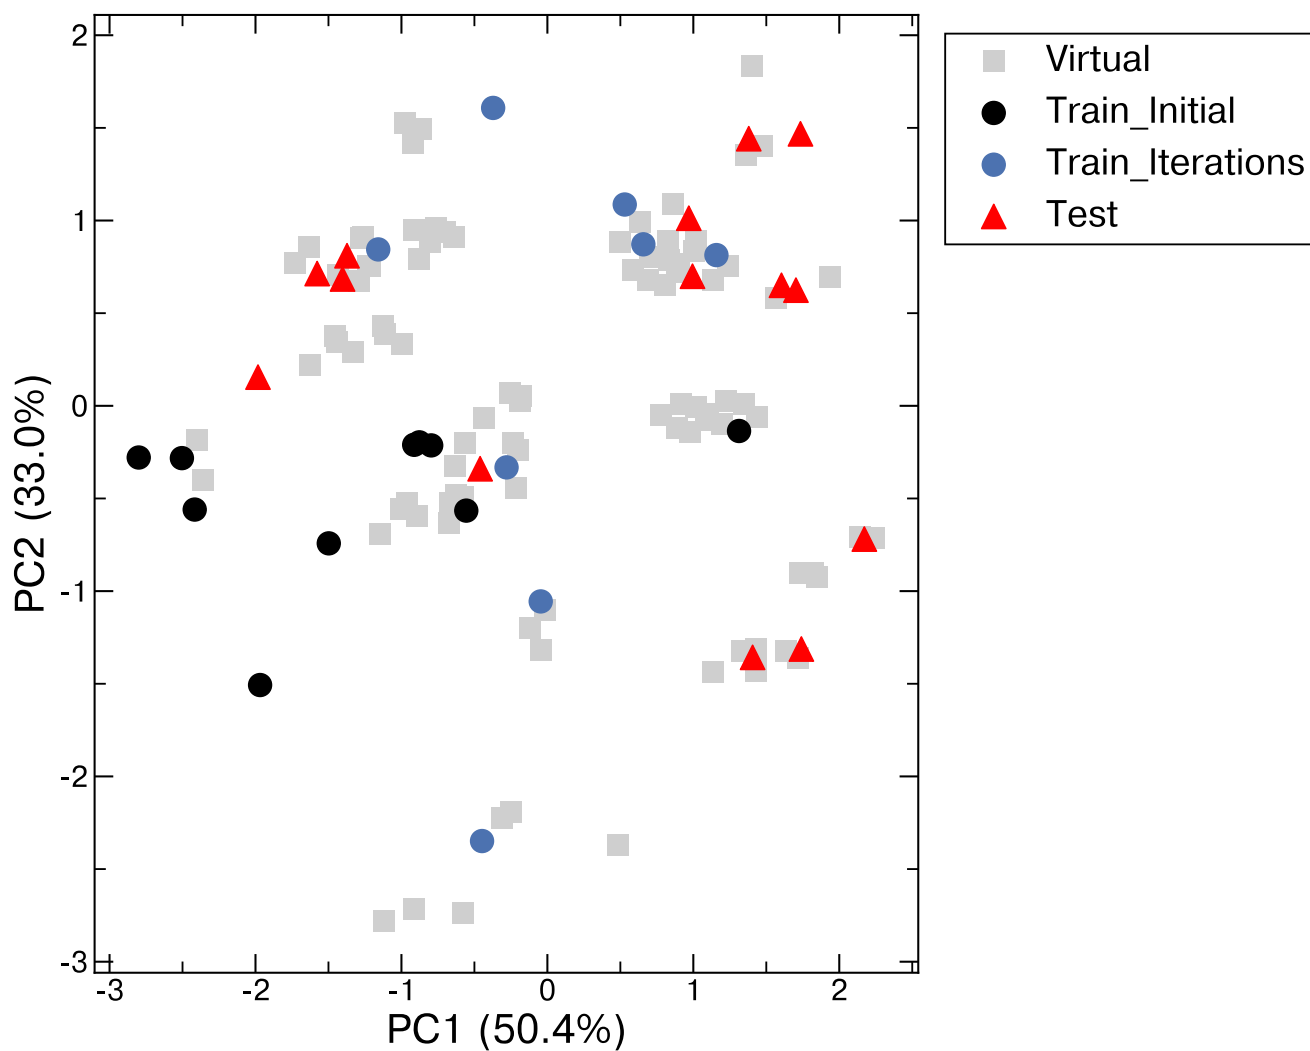

**Figure S3.** PCA projection of the dataset containing 126 compositions after the 9<sup>th</sup> active learning (AL) iteration. PC1 and PC2 account for 50.4% and 33.0% of the total variance, respectively. Gray squares denote unsampled candidates in the virtual library; black circles indicate the initial training set; blue circles mark new points recommended by the information-condensing active learning (ICAL) acquisition function over all AL iterations; and red triangles represent the independent test set drawn randomly from the design space.

### S3 Global feature importance

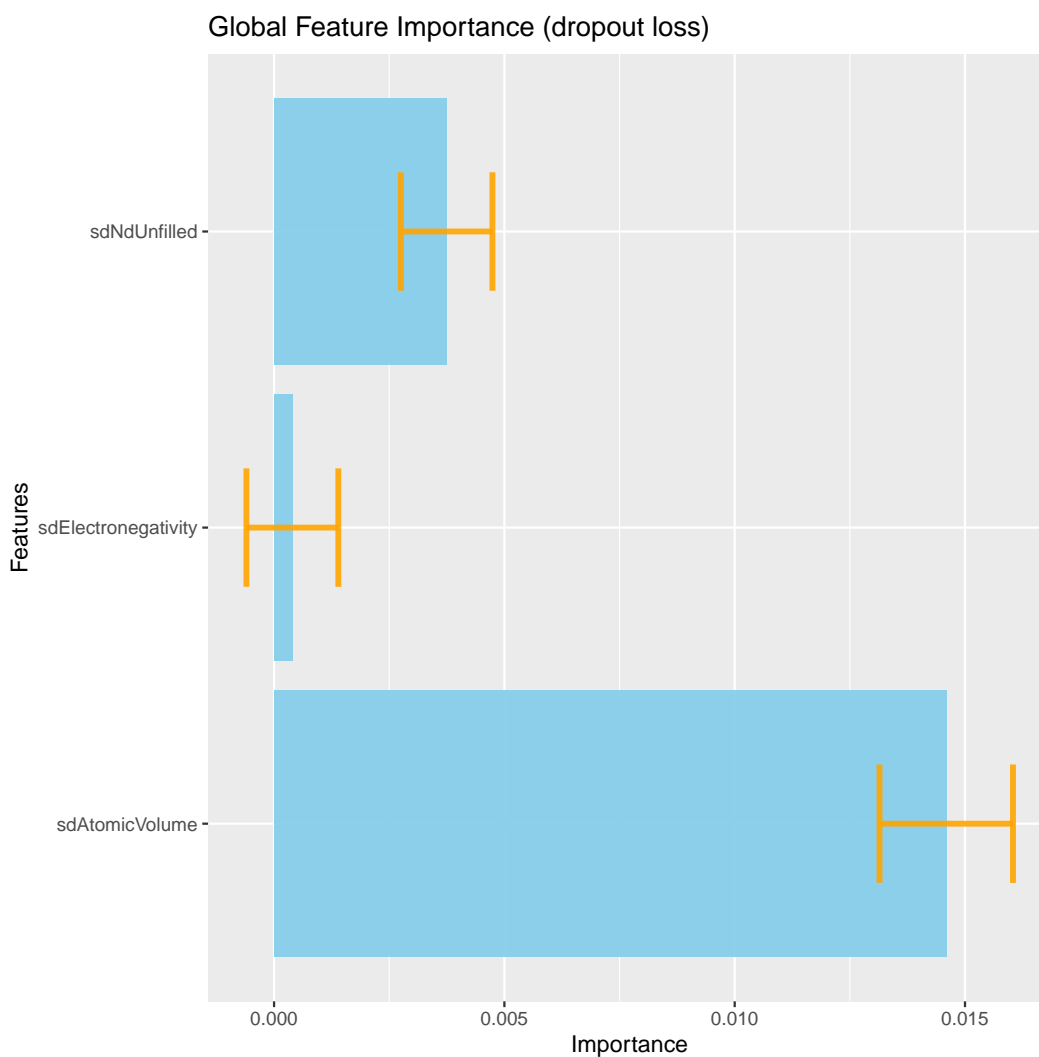

**Figure S4.** Permutation-based global feature importance scores after the 9<sup>th</sup> active learning iteration. Importance (*x*-axis) quantifies the relative contribution of each input feature to model performance, estimated by the decrease in predictive accuracy upon random permutation of that feature.

#### S4 Correlation with Other Descriptors of Atomic Mismatch

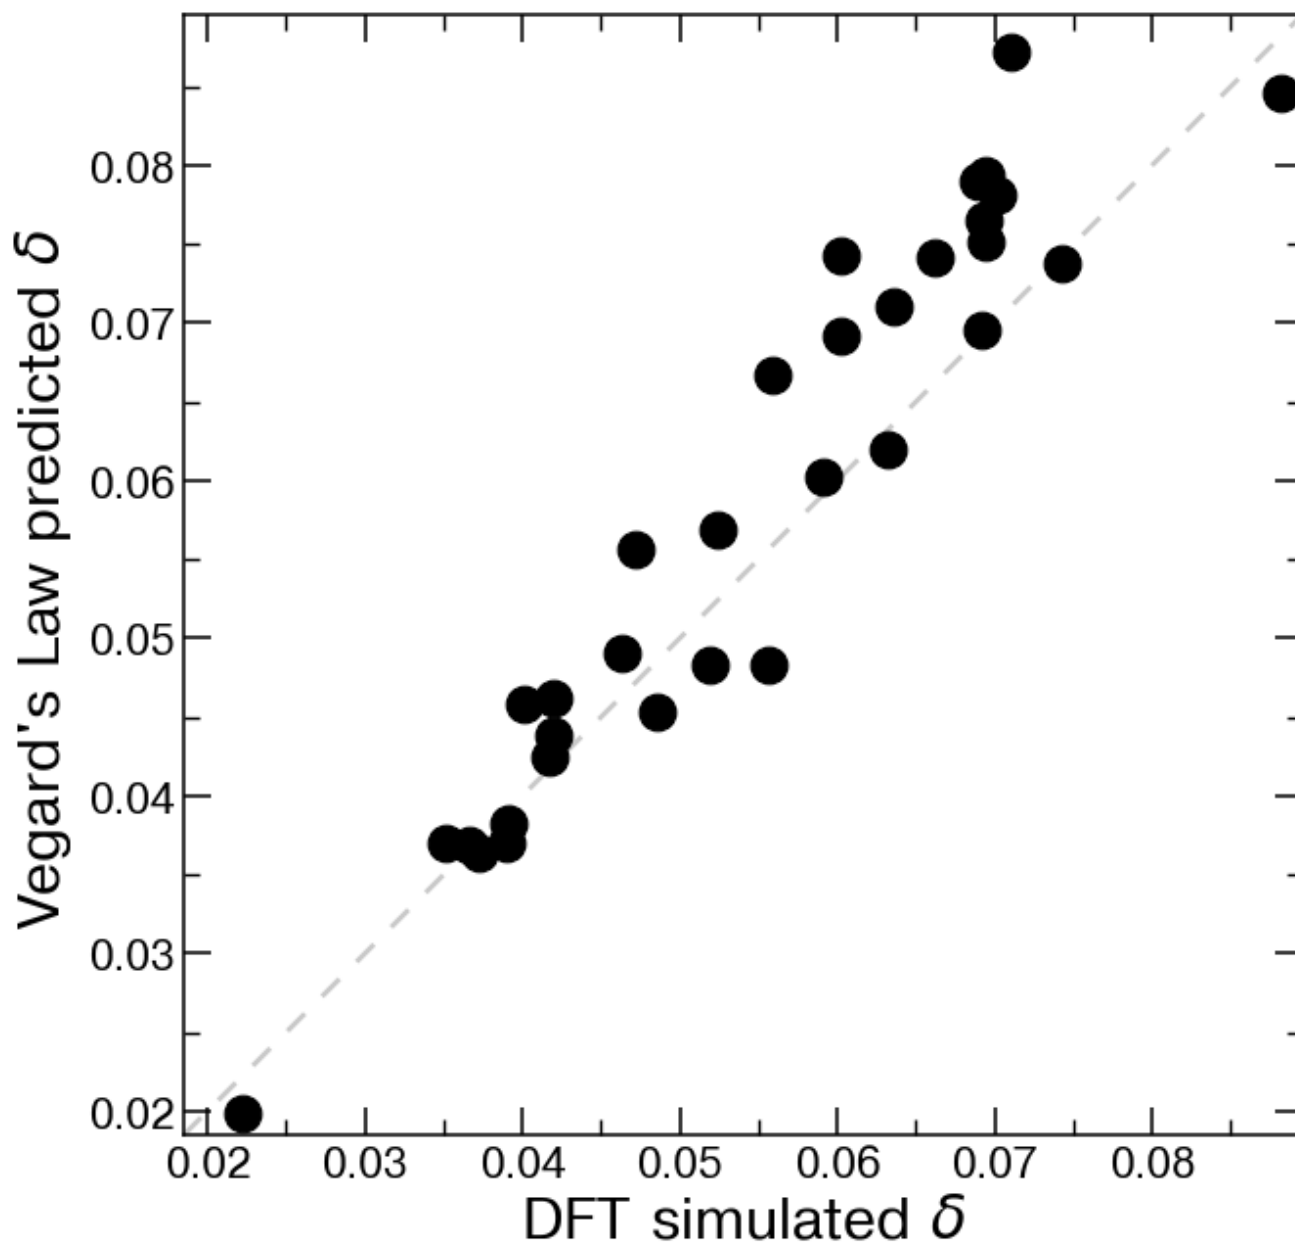

**Figure S5.** Parity plot comparing the Vegard's law approximated  $\delta$ -descriptor (y-axis) against the DFT-simulated  $\delta$ -descriptor (x-axis), with a coefficient of determination  $R^2 = 0.81$ .

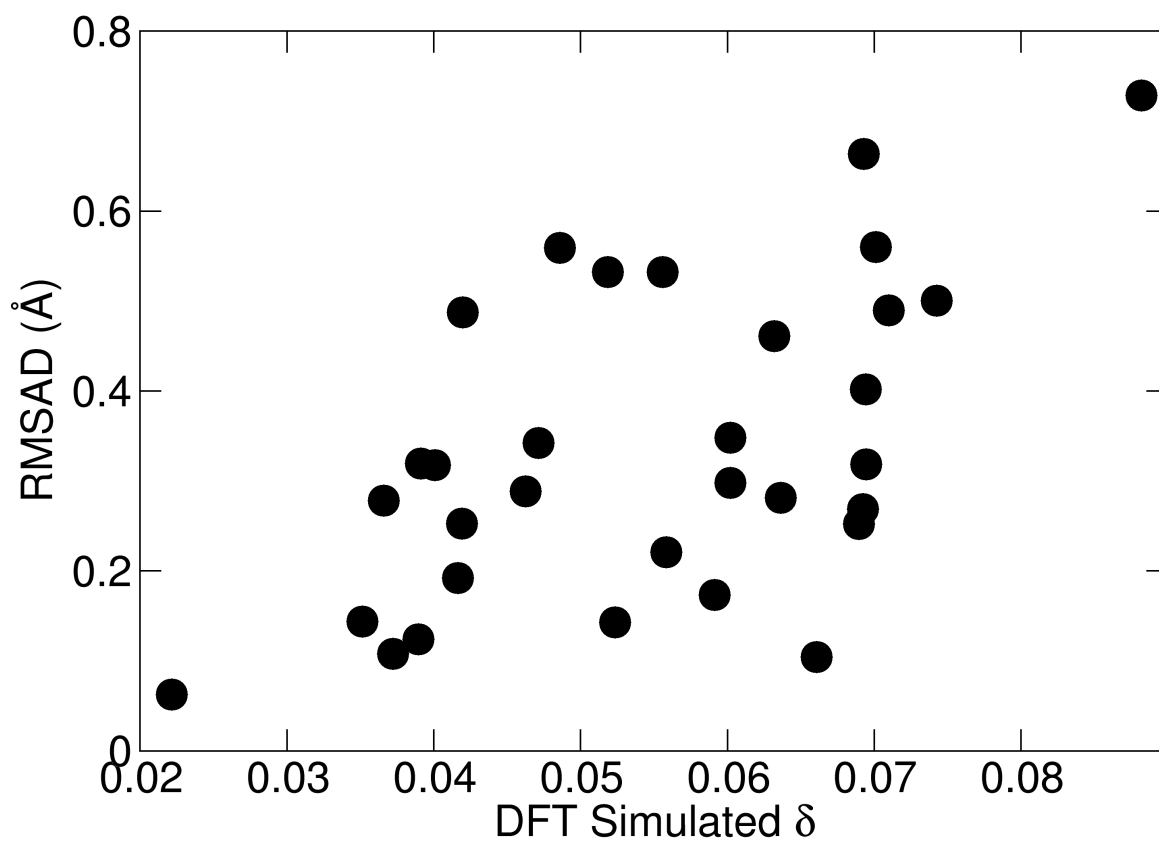

**Figure S6.** Correlation between the root mean square atomic displacement (RMSAD, y-axis) and the DFT-simulated  $\delta$ -descriptor (x-axis), with a Pearson correlation coefficient (PCC) of 0.55.

## S5 Room-Temperature Yield Strength Data

**Table S1.** Comparison of room-temperature yield strength ( $\sigma_y$ ) between Maresa-Curtin mechanistic model predictions ( $\sigma_y^{Mechanistic}$ ) and experiments ( $\sigma_y^{Expt.}$ ) for equiatomic BCC RHEAs. (a) Zr- and Hf-free alloys; (b) Zr- and Hf-containing alloys. Mean  $\sigma_y^{Mechanistic}$  and StdDev  $\sigma_y^{Mechanistic}$  denote the predicted mean and standard deviation of the  $\sigma_y$  from the mechanistic model, respectively.

(a) Zr, Hf-free alloys

| Alloy      | Mean $\sigma_y^{Mechanistic}$ (MPa) | StdDev $\sigma_y^{Mechanistic}$ (MPa) | $\sigma_y^{Expt.}$ (MPa) | Ref.                                |
|------------|-------------------------------------|---------------------------------------|--------------------------|-------------------------------------|
| MoNbTiV    | 1347                                | 523                                   | 1200                     | Chen <i>et al.</i> <sup>1</sup>     |
| MoNbTaVW   | 1478                                | 402                                   | 1246                     | Senkov <i>et al.</i> <sup>2</sup>   |
| MoNbTaW    | 1155                                | 391                                   | 1058                     | Couzinié <i>et al.</i> <sup>3</sup> |
| MoTaTiV    | 1468                                | 454                                   | 1221                     | Qiao <i>et al.</i> <sup>4</sup>     |
| MoNbTaTiV  | 1445                                | 483                                   | 1400                     | Yao <i>et al.</i> <sup>5</sup>      |
| MoNbTaTiVW | 1310                                | 401                                   | 1515                     | Han <i>et al.</i> <sup>6</sup>      |
| MoNbTaTiW  | 970                                 | 363                                   | 1343                     | Senkov <i>et al.</i> <sup>7</sup>   |
| NbTaTiVW   | 1419                                | 418                                   | 1420                     | Yao <i>et al.</i> <sup>8</sup>      |
| NbTaVW     | 1671                                | 462                                   | 1530                     | Yao <i>et al.</i> <sup>8</sup>      |
| NbTaTi     | 1203                                | 916                                   | 620                      | Zyka <i>et al.</i> <sup>9</sup>     |

(b) Zr, Hf-containing alloys

| Alloy        | Mean $\sigma_y^{Mechanistic}$ (MPa) | StdDev $\sigma_y^{Mechanistic}$ (MPa) | $\sigma_y^{Expt.}$ (MPa) | Ref.                                |
|--------------|-------------------------------------|---------------------------------------|--------------------------|-------------------------------------|
| HfMoNbTaTiZr | 2179                                | 729                                   | 1512                     | Juan <i>et al.</i> <sup>10</sup>    |
| HfMoTaTiZr   | 2395                                | 773                                   | 1600                     | Juan <i>et al.</i> <sup>11</sup>    |
| MoNbTiVZr    | 2549                                | 986                                   | 1786                     | Zhang <i>et al.</i> <sup>12</sup>   |
| MoNbTiZr     | 2228                                | 835                                   | 1592                     | Zhang <i>et al.</i> <sup>12</sup>   |
| HfNbTaZr     | 2133                                | 796                                   | 1315                     | Maiti <i>et al.</i> <sup>13</sup>   |
| HfTaTiZr     | 2225                                | 811                                   | 1500                     | Huang <i>et al.</i> <sup>14</sup>   |
| HfMoNbTiZr   | 2306                                | 824                                   | 1575                     | Senkov <i>et al.</i> <sup>7</sup>   |
| NbTiZr       | 2102                                | 837                                   | 975                      | Couzinié <i>et al.</i> <sup>3</sup> |
| HfNbTiZr     | 2031                                | 765                                   | 879                      | Couzinié <i>et al.</i> <sup>3</sup> |
| NbTaTiZr     | 2173                                | 784                                   | 1144                     | Zyka <i>et al.</i> <sup>9</sup>     |
| HfMoNbTaZr   | 2488                                | 795                                   | 1524                     | Tseng <i>et al.</i> <sup>15</sup>   |
| HfMoNbTaTi   | 1877                                | 589                                   | 1369                     | Tseng <i>et al.</i> <sup>15</sup>   |

## References

1. Chen, S. Y., Yang, X., Dahmen, K. A., Liaw, P. K. & Zhang, Y. Microstructures and crackling noise of  $\text{Al}_x\text{NbTiMoV}$  high entropy alloys. *Entropy* **16**, 870–884 (2014).
2. Senkov, O. N., Wilks, G. B., Scott, J. M. & Miracle, D. B. Mechanical properties of  $\text{Nb}_{25}\text{Mo}_{25}\text{Ta}_{25}\text{W}_{25}$  and  $\text{V}_{20}\text{Nb}_{20}\text{Mo}_{20}\text{Ta}_{20}\text{W}_{20}$  refractory high entropy alloys. *Intermetallics* **19**, 698–706 (2011).
3. Couzinié, J.-P. *et al.* On the room temperature deformation mechanisms of a  $\text{TiZrHfNbTa}$  refractory high-entropy alloy. *Mater. Sci. Eng. A* **645**, 255–263 (2015).
4. Qiao, D. X., Jiang, H., Chang, X. X., Lu, Y. P. & Li, T. J. Microstructure and mechanical properties of  $\text{VTaTiMoAl}_x$  refractory high entropy alloys. In *Materials science forum*, vol. 898, 638–642 (Trans Tech Publ, 2017).
5. Yao, H. *et al.* Mechanical properties of refractory high-entropy alloys: Experiments and modeling. *J. Alloy. Compd.* **696**, 1139–1150 (2017).
6. Han, Z. *et al.* Effect of Ti additions on mechanical properties of  $\text{NbMoTaW}$  and  $\text{VNbMoTaW}$  refractory high entropy alloys. *Intermetallics* **84**, 153–157 (2017).
7. Senkov, O. N., Gorsse, S. & Miracle, D. B. High temperature strength of refractory complex concentrated alloys. *Acta Materialia* **175**, 394–405 (2019).
8. Yao, H. *et al.*  $\text{NbTaV}-(\text{Ti}, \text{W})$  refractory high-entropy alloys: Experiments and modeling. *Mater. Sci. Eng. A* **674**, 203–211 (2016).
9. Zýka, J. *et al.* Microstructure and room temperature mechanical properties of different 3 and 4 element medium entropy alloys from  $\text{HfNbTaTiZr}$  system. *Entropy* **21**, 114 (2019).
10. Juan, C.-C. *et al.* Solution strengthening of ductile refractory  $\text{HfMo}_x\text{NbTaTiZr}$  high-entropy alloys. *Mater. Lett.* **175**, 284–287 (2016).
11. Juan, C.-C. *et al.* Enhanced mechanical properties of  $\text{HfMoTaTiZr}$  and  $\text{HfMoNbTaTiZr}$  refractory high-entropy alloys. *Intermetallics* **62**, e83 (2015).
12. Zhang, Y., Yang, X. & Liaw, P. Alloy design and properties optimization of high-entropy alloys. *JOM* **64**, 830–838 (2012).
13. Maiti, S. & Steurer, W. Structural-disorder and its effect on mechanical properties in single-phase  $\text{TaNbHfZr}$  high-entropy alloy. *Acta Materialia* **106**, 87–97 (2016).
14. Huang, H. *et al.* Phase-transformation ductilization of brittle high-entropy alloys via metastability engineering. *Adv. Mater.* **29**, 1701678 (2017).
15. Tseng, K.-K. *et al.* Effects of Mo, Nb, Ta, Ti, and Zr on mechanical properties of equiatomic  $\text{Hf-Mo-Nb-Ta-Ti-Zr}$  alloys. *Entropy* **21**, 15 (2018).
